# Supplementary material for: Hepatitis Delta Virus histone mimicry drives the recruitment of chromatin remodelers for viral RNA replication
Source: Springer Nature journal article supplement (doi:10.1038/s41467-020-14299-9), 2020-01-21

**Figure 1. The chromatin remodeling complexes BRF1 and BRF5 interact with the HDV RNP**

Fig. 1a Interaction of wt SHDAg with endogenous SNF2L, SNF2H and BAZ2B.

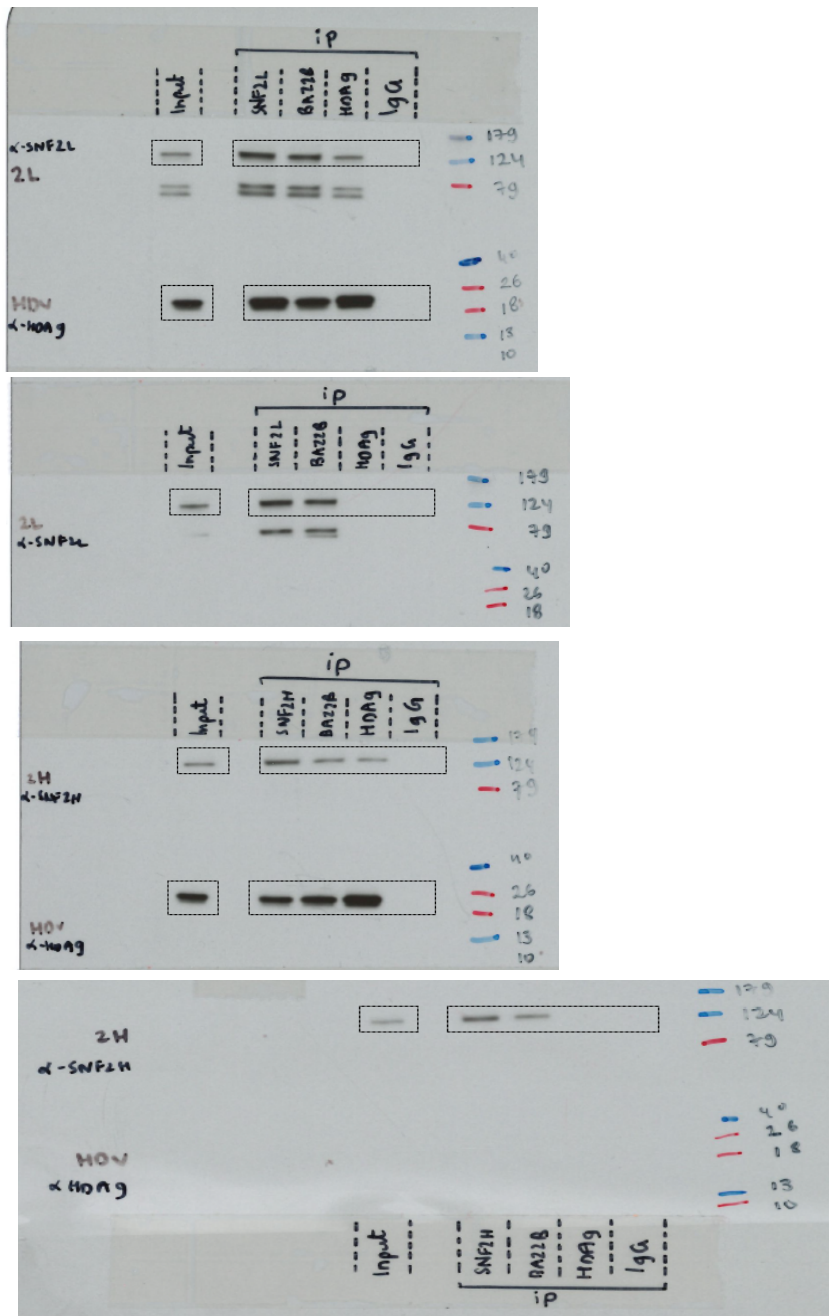

**Figure 1. The chromatin remodeling complexes BRF1 and BRF5 interact with the HDV RNP**

Fig. 1b Amplification of SNF2L variants from hepatocyte derived cell lines.

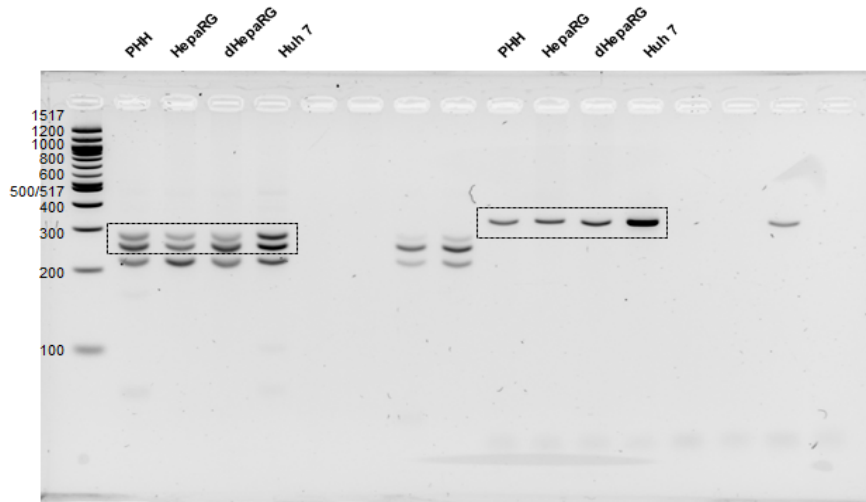

**Figure 1. The chromatin remodeling complexes BRF1 and BRF5 interact with the HDV RNP**

Fig. 1c HDV RNA immunoprecipitation assays (Huh 7)

|        | % input   |           |           | Mean        | SEM        |
|--------|-----------|-----------|-----------|-------------|------------|
|        | Dataset 1 | Dataset 2 | Dataset 3 |             |            |
| HDAg   | 66,4      | 51,3      | 70,25     | 62,65       | 5,78280497 |
| Pol II | 17,4      | 17,8      | 17        | 17,4        | 0,23094011 |
| SNF2L  | 17,9      | 9,9       | 17,903    | 15,23433333 | 2,66716681 |
| SNF2H  | 4,2       | 2,5       | 2,09      | 2,93        | 0,64593601 |
| BAZ2B  | 7,8       | 8         | 4,88      | 6,89333333  | 1,00832094 |
| H3     | 0,3       | 0,3       | 0,3       | 0,3         | 0          |

**Figure 1. The chromatin remodeling complexes BRF1 and BRF5 interact with the HDV RNP**

Fig. 1d HDV RNA immunoprecipitation assays (PHH)

|        | % input   |           |           | Mean        | SEM        |
|--------|-----------|-----------|-----------|-------------|------------|
|        | Dataset 1 | Dataset 2 | Dataset 3 |             |            |
| HDAg   | 41,7      | 38,5      | 38,4      | 39,53333333 | 1,08371788 |
| Pol II | 8,6       | 8,5       | 9,87      | 8,99        | 0,44094595 |
| SNF2L  | 16,6      | 12,4      | 32,8      | 20,6        | 6,21932472 |
| SNF2H  | 7,9       | 6,7       | 16,8      | 10,4666667  | 3,18555769 |
| BAZ2B  | 8,5       | 9,14      | 14        | 10,5466667  | 1,73652271 |
| H3     | 0         | 0         | 0         | 0           | 0          |



**Figure 1. The chromatin remodeling complexes BRF1 and BRF5 interact with the HDV RNP**

Fig. 1e Genomic HDV RIP assay

|        | % Input    |            |            |            | Mean       | SEM        |
|--------|------------|------------|------------|------------|------------|------------|
|        | Dataset 1  | Dataset 2  | Dataset 3  | Dataset 4  |            |            |
| HDAg   | 6,93393964 | 13,6944841 | 18,2415342 | 37,1852383 | 19,0137991 | 6,48726773 |
| Pol II | 3,21020242 | 4,13601359 |            |            | 3,673108   | 0,46290559 |
| SNF2L  | 0,4834148  | 0,99918588 | 2,37655899 | 1,02705889 | 1,22155464 | 0,40477998 |
| SNF2H  | 0,82221039 | 1,11080683 | 0,44137169 | 0,65960048 | 0,75849734 | 0,14098776 |
| BAZ2B  | 0,05733281 | 0,32804742 | 1,17118793 | 3,03695919 | 1,14838184 | 0,67271719 |
| H3     | 0          | 0          | 0          | 0          | 0          | 0          |

**Figure 1. The chromatin remodeling complexes BRF1 and BRF5 interact with the HDV RNP**

Fig. 1f Antigenomic HDV RIP assay

|        | % Input    |            |            |            | Mean       | SEM        |
|--------|------------|------------|------------|------------|------------|------------|
|        | Dataset 1  | Dataset 2  | Dataset 3  | Dataset 4  |            |            |
| HDAg   | 10,7933851 | 9,85300516 | 2,9482294  | 6,51237659 | 7,52674906 | 1,78124891 |
| Pol II | 14,1397606 | 3,16034039 |            |            | 8,65005051 | 5,48971011 |
| SNF2L  | 2,56593339 | 1,1039913  | 0,93908429 | 0,41316409 | 1,25554327 | 0,46096269 |
| SNF2H  | 0,36101827 | 0,36836793 | 0,30141778 | 0,30141778 | 0,33305544 | 0,01832752 |
| BAZ2B  | 0,49641817 | 0,39131449 | 0,47094282 | 0,42134856 | 0,44500601 | 0,0237318  |
| H3     | 0          | 0          | 0          | 0          | 0          | 0          |

**Figure 2. BAZ2B enhances HDV replication and its BRD interacts with S-HDAg.**

Fig. 2a Decrease in HDV RNA replication in PHHs transduced with shRNAs against BAZ2B

|                | Relative BAZ2B mRNA expression |            |            |            | Mean   | SEM      |
|----------------|--------------------------------|------------|------------|------------|--------|----------|
|                | Dataset 1                      | Dataset 2  | Dataset 3  | Dataset 4  |        |          |
| Scramble shRNA | 1,010549536                    | 1,01113921 | 1,00447095 | 1,01999936 | 1,012  | 0,003197 |
| BAZ2B shRNA #1 | 0,4061262                      | 0,36014922 | 0,66741993 | 0,82169031 | 0,5638 | 0,1094   |
| BAZ2B shRNA #2 | 0,77736641                     | 0,3959344  | 0,59186224 | 0,79553648 | 0,6402 | 0,09352  |
| BAZ2B shRNA #3 | 0,76136844                     | 0,65671228 | 0,54714685 | 0,45691573 | 0,6055 | 0,06608  |

| Dunn's multiple comparisons test  | Mean rank diff. | Significant? | Summary | Adjusted P Value |
|-----------------------------------|-----------------|--------------|---------|------------------|
| Scramble shRNA vs. BAZ2B shRNA #1 | 8,5             | Yes          | *       | 0,0347           |
| Scramble shRNA vs. BAZ2B shRNA #2 | 7,25            | No           | ns      | 0,0938           |
| Scramble shRNA vs. BAZ2B shRNA #3 | 8,25            | Yes          | *       | 0,0428           |

**Figure 2. BAZ2B enhances HDV replication and its BRD interacts with S-HDAg.**

Fig. 2b Decrease in HDV RNA replication in PHHs transduced with shRNAs against

|                | Relative HDV RNA expression |            |            |            | Mean   | SEM       |
|----------------|-----------------------------|------------|------------|------------|--------|-----------|
|                | Dataset 1                   | Dataset 2  | Dataset 3  | Dataset 4  |        |           |
| Scramble shRNA | 1,000678007                 | 1,00230515 | 1,00043129 | 1,00130385 | 1,001  | 0,0004671 |
| BAZ2B shRNA #1 | 0,150456256                 | 0,5015972  | 0,16229232 | 0,61985385 | 0,3585 | 0,1192    |
| BAZ2B shRNA #2 | 0,234583984                 | 0,29244033 | 0,25115792 | 0,50697974 | 0,3213 | 0,06308   |
| BAZ2B shRNA #3 | 0,592711787                 | 0,20075601 | 0,76843759 | 0,39410902 | 0,489  | 0,1228    |

| Dunn's multiple comparisons test  | Mean rank diff. | Significant? | Summary | Adjusted. P Value |
|-----------------------------------|-----------------|--------------|---------|-------------------|
| Scramble shRNA vs. BAZ2B shRNA #1 | 9               | Yes          | *       | 0,0225            |
| Scramble shRNA vs. BAZ2B shRNA #2 | 8,5             | Yes          | *       | 0,0347            |
| Scramble shRNA vs. BAZ2B shRNA #3 | 6,5             | No           | ns      | 0,1605            |

**Figure 2. BAZ2B enhances HDV replication and its BRD interacts with S-HDAg.**

Fig. 2c PHHs survival was assessed by performing the Red Neutral assay following transduction with BAZ2B shRNAs

| Cell viability (% of control) |             |            |            |            |            |
|-------------------------------|-------------|------------|------------|------------|------------|
| Non-infected                  |             |            |            |            |            |
|                               | Dataset 1   | Dataset 2  | Dataset 3  | Mean       | SEM        |
| Scramble shRN                 | 87,12765957 | 87,6400299 | 86,74189   | 87,1698598 | 0,26012783 |
| BAZ2B shRNA #                 | 87,5912409  | 87,6737381 | 87,5867105 | 87,6172298 | 0,02828438 |
| BAZ2B shRNA #                 | 87,6589379  | 87,5748503 | 87,6029963 | 87,6122615 | 0,0247121  |
| BAZ2B shRNA #                 | 90,3004945  | 90,4       | 90,4271548 | 90,3758831 | 0,03850076 |

| Cell viability (% of control) |             |            |            |            |            |
|-------------------------------|-------------|------------|------------|------------|------------|
| HDV infected                  |             |            |            |            |            |
|                               | Dataset 1   | Dataset 2  | Dataset 3  | Mean       | SEM        |
| Scramble shRN                 | 89,92932862 | 86,6714697 | 89,4625922 | 88,6877969 | 1,017127   |
| BAZ2B shRNA #                 | 88,4335504  | 89,0909091 | 88,2577202 | 88,5940599 | 0,25355697 |
| BAZ2B shRNA #                 | 86,4321608  | 86,4864865 | 86,0623432 | 86,3269968 | 0,13325287 |
| BAZ2B shRNA #                 | 90,1481481  | 90,6959434 | 90,5970149 | 90,4803688 | 0,16854738 |

**Figure 2. BAZ2B enhances HDV replication and its BRD interacts with S-HDAg.**

Fig. 2d Decrease in HDV RNA replication in PHHs treated with the the BAZ2B inhibitor

|         | Relative HDV RNA expression |            |            |           |            |            |            | Mean   | SEM      |
|---------|-----------------------------|------------|------------|-----------|------------|------------|------------|--------|----------|
|         | Dataset 1                   | Dataset 2  | Dataset 3  | Dataset 4 | Dataset 5  | Dataset 6  | Dataset 7  |        |          |
| DMSO    | 1,00229909                  | 1,00139677 | 1,00347391 | 1,0004325 | 1,0005904  | 1,00362177 | 1,00046093 | 1,002  | 0,000527 |
| GSK2801 | 0,59186224                  | 0,42829201 | 0,3842188  | 0,3142533 | 0,39216991 | 0,33892888 | 0,23947184 | 0,3842 | 0,0417   |
| GSK8573 | 0,82169031                  | 1,21981864 | 1,035265   | 1,235419  | 1,15647134 | 1,36755906 | 1,39187272 | 1,175  | 0,07472  |

| Dunn's multiple comparisons test | Mean rank diff | Significant? | Summary | Adjusted P Value |
|----------------------------------|----------------|--------------|---------|------------------|
| DMSO vs. GSK2801                 | 8              | Yes          | *       | 0,0317           |
| DMSO vs. GSK8573                 | -5             | No           | ns      | 0,2633           |

**Figure 2. BAZ2B enhances HDV replication and its BRD interacts with S-HDAg.**

Fig. 2e PHHs survival was assessed by performing the Red Neutral assay following treatment with either GSK2801 or GSK8573

| GSK 2801           |            |            |            |            |            |
|--------------------|------------|------------|------------|------------|------------|
| Concentration (μM) | Dataset 1  | Dataset 2  | Dataset 3  | Mean       | SEM        |
| 1                  | 92,369911  | 96,4822695 | 100,787898 | 96,5466928 | 2,43027698 |
| 5                  | 118,137622 | 104,756469 | 102,831595 | 108,575229 | 4,81337761 |
| 10                 | 108,256543 | 86,3806605 | 96,6491724 | 97,0954586 | 6,31896451 |
| 15                 | 81,1570782 | 110,21571  | 102,232797 | 97,8685282 | 8,66768229 |
| 20                 | 114,163823 | 99,5939911 | 94,5724907 | 102,776768 | 5,87516321 |
| 25                 | 89,8573693 | 93,6067019 | 91,1420205 | 91,5353639 | 1,10006258 |
| 30                 | 131,452404 | 88,3548261 | 84,9646446 | 101,590625 | 14,9629289 |
| 40                 | 89,2845146 | 117,321504 | 92,2073215 | 99,6044467 | 8,89861955 |

| GSK 8573           |            |            |            |            |            |
|--------------------|------------|------------|------------|------------|------------|
| Concentration (μM) | Dataset 1  | Dataset 2  | Dataset 3  | Mean       | SEM        |
| 1                  | 100,970612 | 94,893617  | 100,346675 | 98,736968  | 1,93009797 |
| 5                  | 113,462977 | 111,643836 | 98,9567809 | 108,021198 | 4,56253077 |
| 10                 | 67,0475488 | 78,9581205 | 94,0250303 | 80,0102332 | 7,80547528 |
| 15                 | 55,8823529 | 97,0695971 | 86,0175695 | 79,6565065 | 12,3077836 |
| 20                 | 68,5153584 | 78,6845311 | 77,2118959 | 74,8039285 | 3,17289293 |
| 25                 | 68,2646593 | 85,0529101 | 64,7144949 | 72,6773548 | 6,27207287 |
| 30                 | 93,8174681 | 54,0445487 | 71,2690733 | 73,0436967 | 11,5156885 |
| 40                 | 17,7695667 | 28,7705957 | 36,3537514 | 27,6313046 | 5,39495037 |

**Figure 2. BAZ2B enhances HDV replication and its BRD interacts with S-HDAg.**

Fig. 2f HDV RIP in HDV infected PHHs treated with BAZ2B inhibitor GSK2801

|        | DMSO (% Input) |            |            | Mean       | SEM        |
|--------|----------------|------------|------------|------------|------------|
|        | Dataset 1      | Dataset 2  | Dataset 3  |            |            |
| HDAg   | 32,580135      | 27,6474876 | 26,8115901 | 29,0130709 | 1,79978155 |
| Pol II | 23,2629929     | 20,2308746 | 19,5278987 | 21,0072554 | 1,14597957 |
| BAZ2B  | 5,68337664     | 5,04257722 | 4,13151518 | 4,95248968 | 0,45024265 |
| SNF2L  | 28,2083027     | 24,3848131 | 23,6791921 | 25,4241026 | 1,40692368 |
| H3     | 0,2            | 0,2        | 0,2        | 0,2        | 1,9626E-17 |

|        | GSK2801 (% Input) |            |            | Mean       | SEM        |
|--------|-------------------|------------|------------|------------|------------|
|        | Dataset 1         | Dataset 2  | Dataset 3  |            |            |
| HDAg   | 21,5985295        | 8,15111594 | 8,45794497 | 12,7358635 | 4,43221814 |
| Pol II | 8,09710022        | 3,83965457 | 3,49897587 | 5,14524355 | 1,47920123 |
| BAZ2B  | 0                 | 0,14515301 | 0,06707057 | 0,07074119 | 0,04194224 |
| SNF2L  | 9,53065231        | 4,5539314  | 4,38785414 | 6,15747928 | 1,68726777 |
| H3     | 0,2               | 0,2        | 0,2        | 0,2        | 1,9626E-17 |



**Figure 2. BAZ2B enhances HDV replication and its BRD interacts with S-HDAg.**

Fig. 2g Pull-down assay of Strep-Tagged S-HDAg and BAZ2B BRD

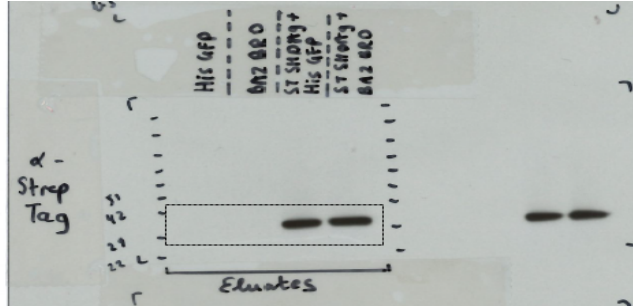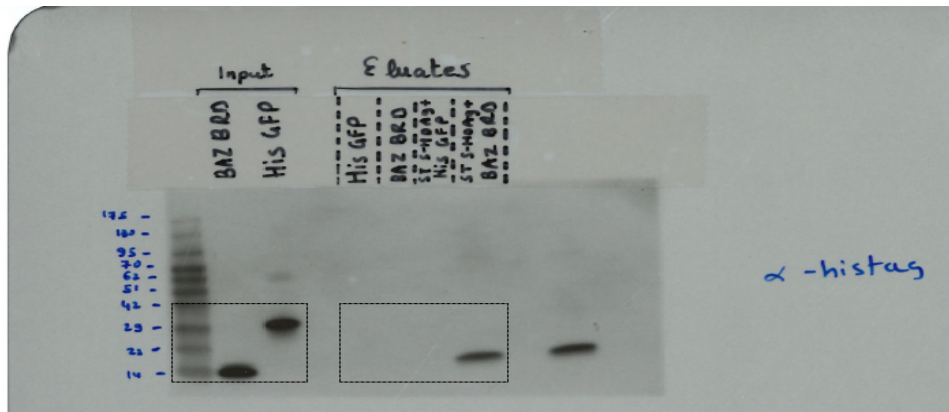

**Figure 3. R75A S-HDAg mutation affects the binding to BAZ2B BRD- without altering S-HDAg localization and acetylation.**

Fig. 3b Wt S-HDAg and R75A S-HDAg proteins have a similar nuclear localization pattern

Provided upon request

(The files could not be enclosed since they were too heavy to be uploaded)

**Figure 3. R75A S-HDAg mutation affects the binding to BAZ2B BRD- without altering S-HDAg localization and acetylation.**

Fig. 3c Wt and R75A S-HDAg are expressed at the same level

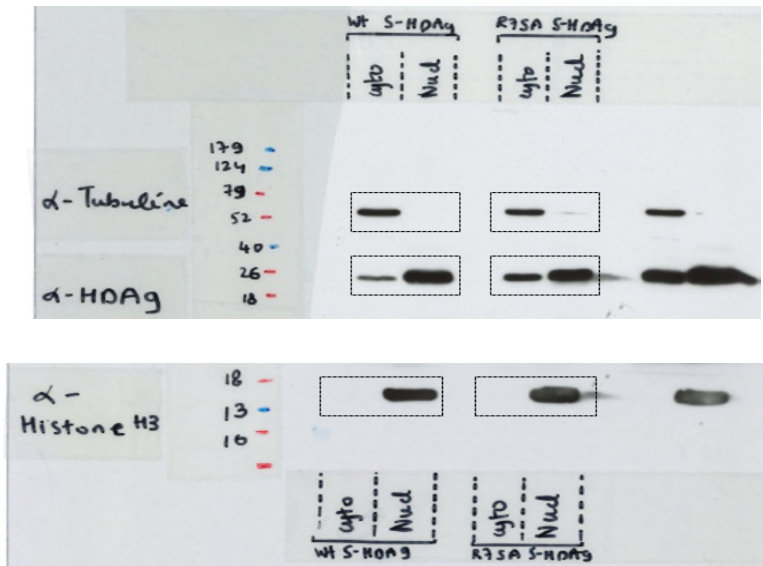

**Figure 3. R75A S-HDAg mutation affects the binding to BAZ2B BRD- without altering S-HDAg localization and acetylation.**

Fig. 3d Wt and R75A S-HDAg have similar acetylation levels in Huh7 cells stably expressing each proteins

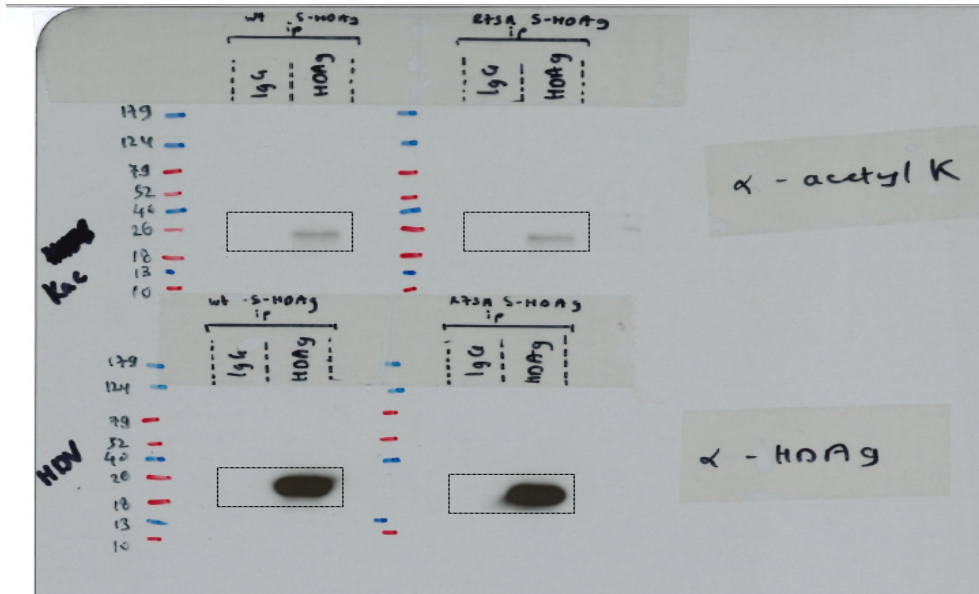

**Figure 3. R75A S-HDAg mutation affects the binding to BAZ2B BRD without altering S-HDAg localization and acetylation.**

Fig. 3e S-HDAg and R75A S-HDAg protein stability (Cycloheximide 100  $\mu$ g/ml)

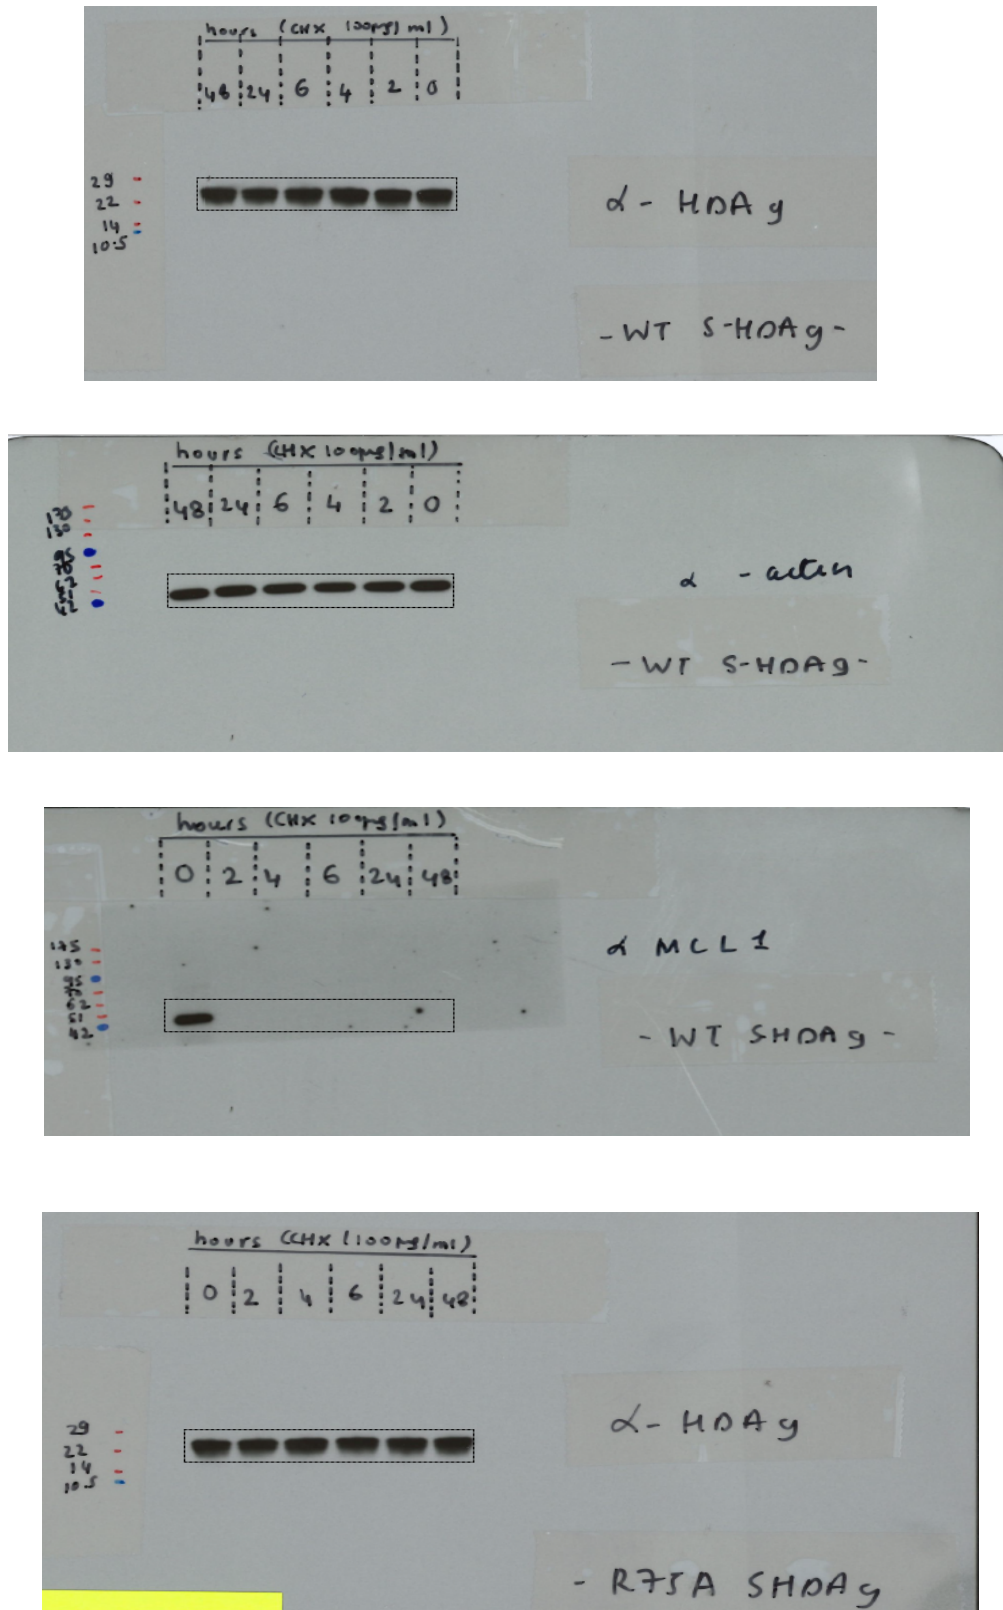

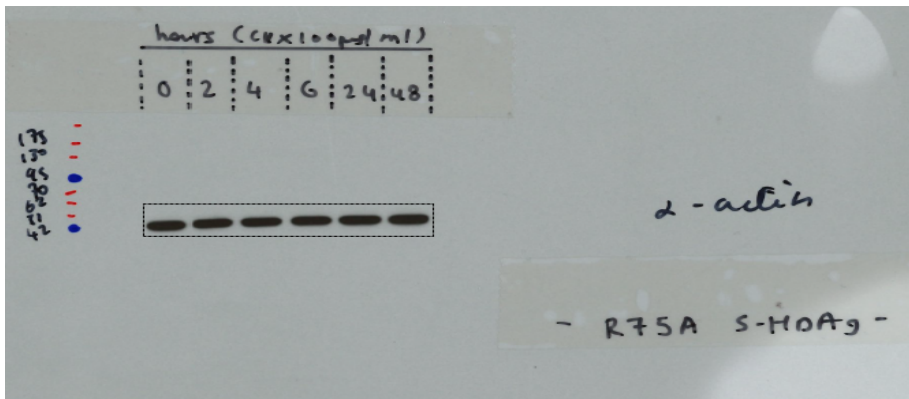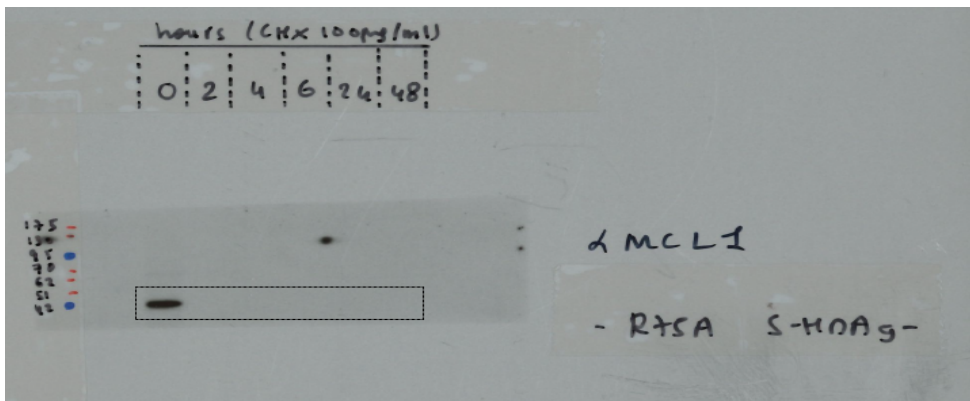



**Figure 3. R75A S-HDAg mutation affects the binding to BAZ2B BRD- without altering S-HDAg localization and acetylation.**

Fig. 3f Co-immunoprecipitation of SHDAg and GFP-Tag-BAZ2B BRD

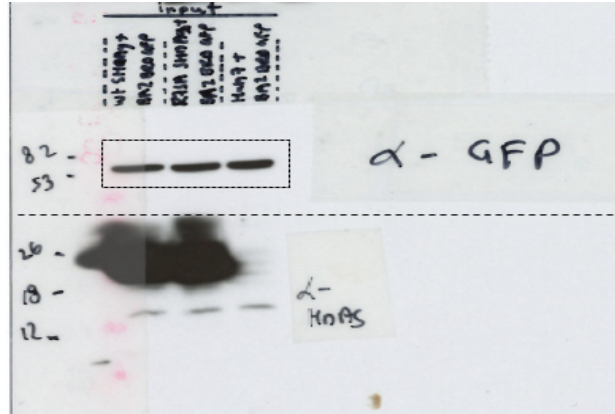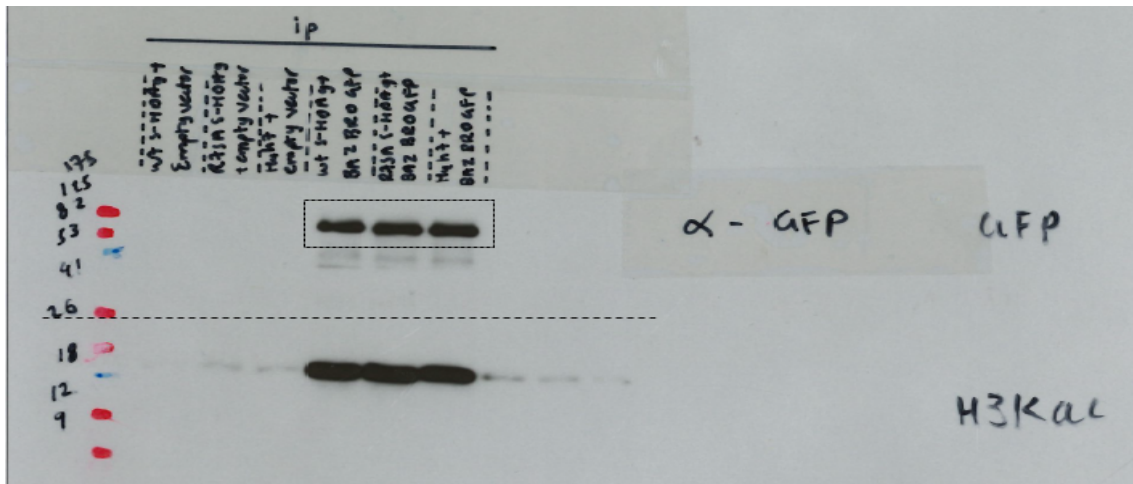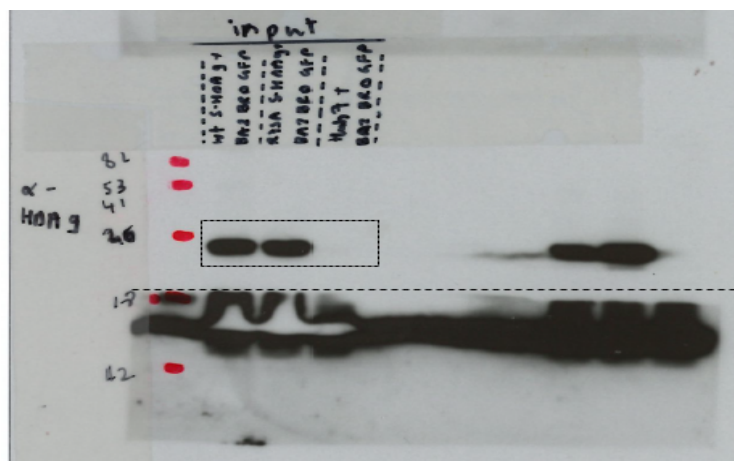

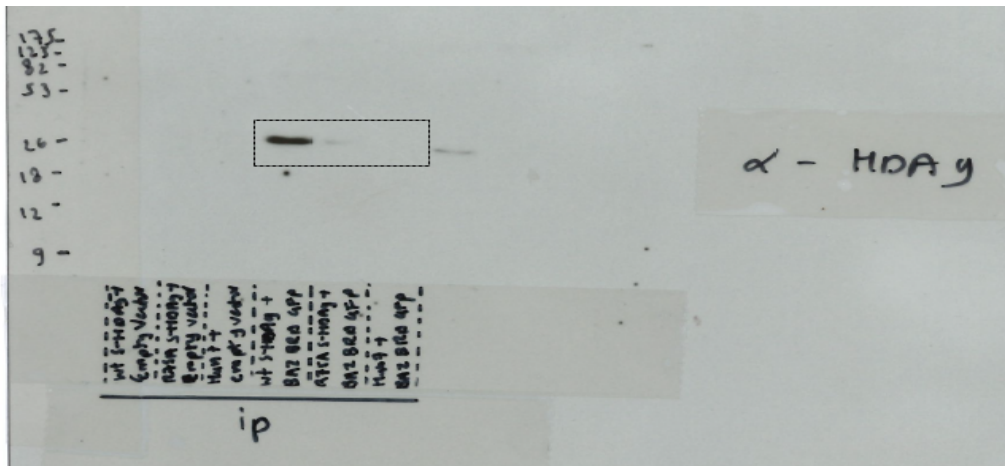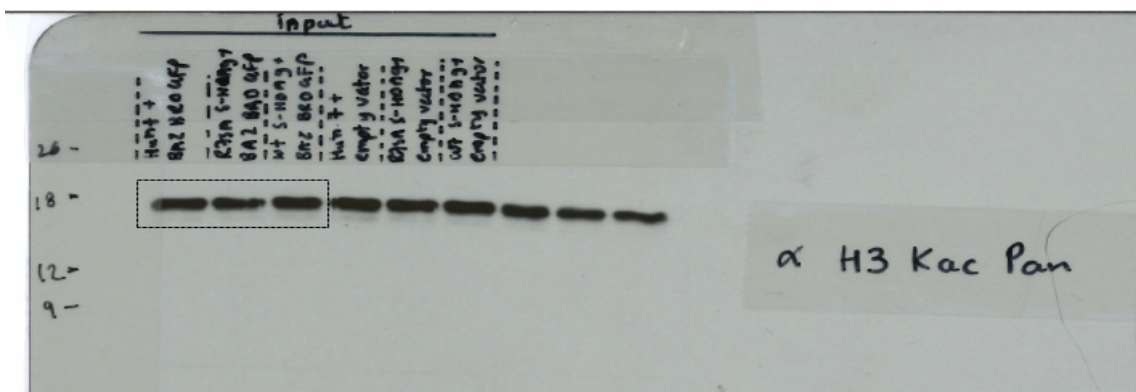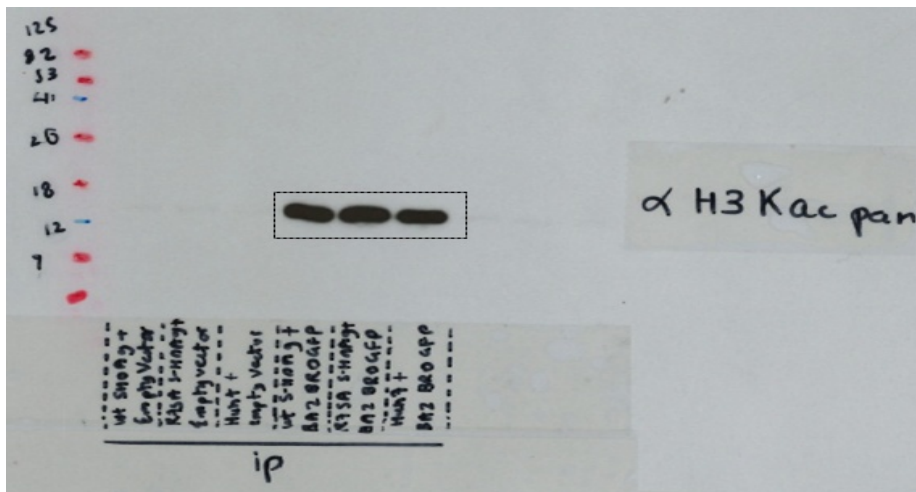



### Figure 4. Loss of HDAG Binding to BAZ2B Impairs HDV Replication

Fig. 4a Representative northern blot indicating the decrease in the accumulation in the presence of the R75A S-HDAg protein g HDV RNA

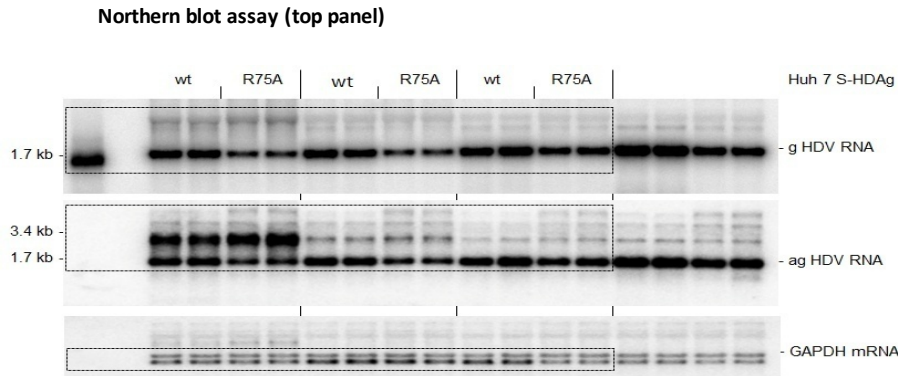

Northern blot histograms values (lower panel)

#### Genomic

|       | Huh 7 S-HDAg WT<br>% g HDV RNA |           |           |      |     |
|-------|--------------------------------|-----------|-----------|------|-----|
|       | Dataset 1                      | Dataset 2 | Dataset 3 | Mean | SEM |
| Day 3 | 100                            | 100       | 100       | 100  | 0   |
| Day 6 | 100                            | 100       | 100       | 100  | 0   |
| Day 9 | 100                            | 100       | 100       | 100  | 0   |

|       | Huh 7 S-HDAg R75A<br>% g HDV RNA |           |           |            |            |
|-------|----------------------------------|-----------|-----------|------------|------------|
|       | Dataset 1                        | Dataset 2 | Dataset 3 | Mean       | SEM        |
| Day 3 | 34                               | 48        | 21        | 34,3333333 | 7,79601038 |
| Day 6 | 31                               | 48        | 66        | 48,3333333 | 10,1050043 |
| Day 9 | 63                               | 73        | 44        | 60         | 8,50490055 |

#### Multiple comparison test using Holm-Sidak correction method

|       | Significant? | P value    | Mean1 | Mean2 | Difference | SE of difference | t ratio | df | Adjusted P Value |
|-------|--------------|------------|-------|-------|------------|------------------|---------|----|------------------|
| Day 3 | Yes          | 0,00016552 | 100   | 34,33 | 65,67      | 6,523            | 10,07   | 5  | 0,00049646       |
| Day 6 | Yes          | 0,00170025 | 100   | 48,33 | 51,67      | 8,454            | 6,111   | 5  | 0,00339762       |
| Day 9 | Yes          | 0,00246644 | 100   | 60    | 40         | 7,116            | 5,621   | 5  | 0,00339762       |

#### Antigenomic

|       | Huh 7 S-HDAg WT<br>% ag HDV RNA |           |           |      |     |
|-------|---------------------------------|-----------|-----------|------|-----|
|       | Dataset 1                       | Dataset 2 | Dataset 3 | Mean | SEM |
| Day 3 | 100                             | 100       | 100       | 100  | 0   |
| Day 6 | 100                             | 100       | 100       | 100  | 0   |
| Day 9 | 100                             | 100       | 100       | 100  | 0   |

|       | Huh 7 S-HDAg R75A<br>% ag HDV RNA |           |           |      |            |
|-------|-----------------------------------|-----------|-----------|------|------------|
|       | Dataset 1                         | Dataset 2 | Dataset 3 | Mean | SEM        |
| Day 3 | 49                                | 39        | 59        | 49   | 5,77350269 |
| Day 6 | 69                                | 59        | 79        | 69   | 5,77350269 |
| Day 9 | 79                                | 73        | 85        | 79   | 3,46410162 |

#### Multiple comparison test using Holm-Sidak correction method

|       | Significant? | P value    | Mean1 | Mean2 | Difference | SE of difference | t ratio | df | Adjusted P Value |
|-------|--------------|------------|-------|-------|------------|------------------|---------|----|------------------|
| Day 3 | Yes          | 0,00090658 | 100   | 49    | 51         | 5,774            | 8,833   | 4  | 0,00271727       |
| Day 6 | Yes          | 0,00580981 | 100   | 69    | 31         | 5,774            | 5,369   | 4  | 0,00746292       |
| Day 9 | Yes          | 0,00373845 | 100   | 79    | 21         | 3,464            | 6,062   | 4  | 0,00746292       |

**Northern blot dataset 3 (g HDV RNA)**

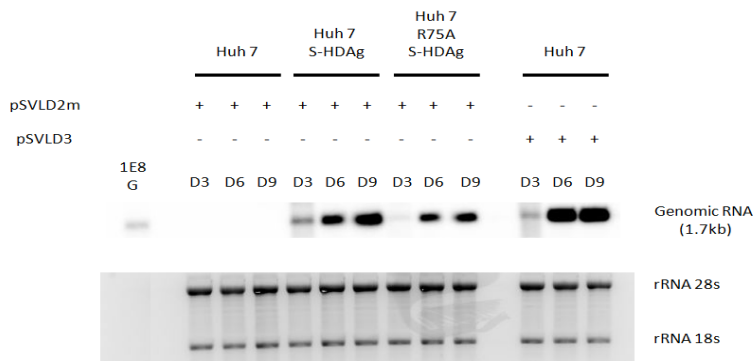

**Northern blot dataset 3 (ag HDV RNA)**

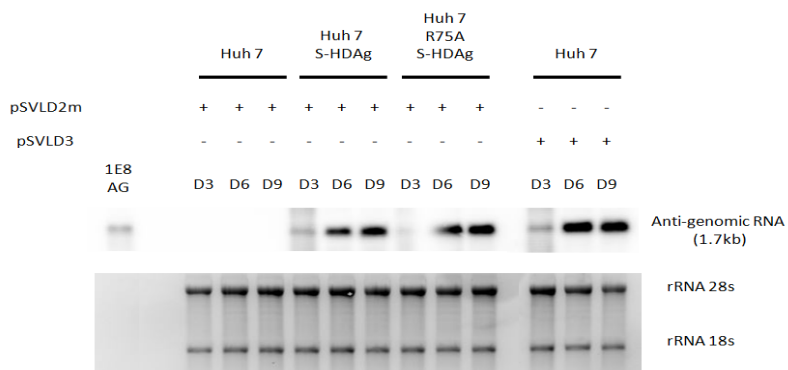

### Figure 4. Loss of HDAG Binding to BAZ2B Impairs HDV Replication

Fig 4b. PHHs infection with wt HDV or recombinant R75A HDV mutant

#### Protein analysis (Western blot) - upper panel

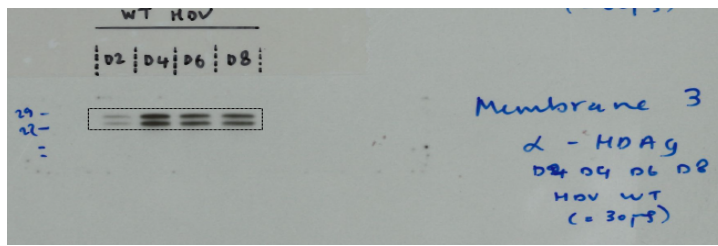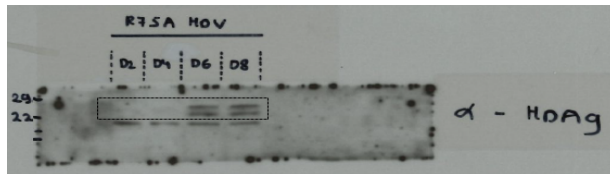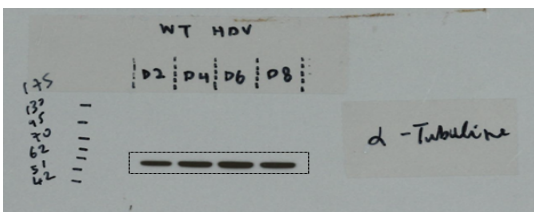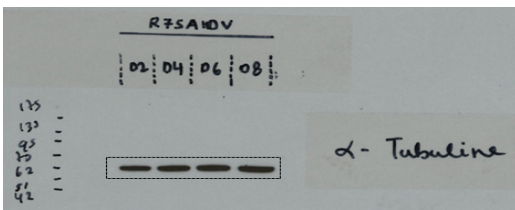

#### RNA analysis (Northern blot assay) - middle panel

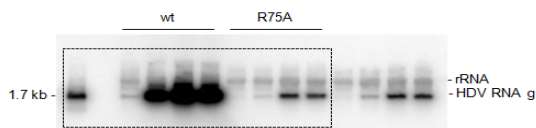

#### Northern blot histogram values (lower panel)

| Huh 7 S-HDAg WT<br>% g HDV RNA |           |                               |            |             |             |
|--------------------------------|-----------|-------------------------------|------------|-------------|-------------|
|                                | Dataset 1 | Technical replicate dataset 1 | Dataset 2  | Mean        | SEM         |
| Day 2                          | 7130518,8 | 7122443,32                    | 7140618,75 | 7131193,606 | 5257,63457  |
| Day 4                          | 491275758 | 385755987                     | 280382989  | 385804911,2 | 60879503,39 |
| Day 6                          | 1,173E+09 | 1018906621                    | 868640477  | 1020274780  | 87943719,77 |
| Day 8                          | 973018989 | 887250503                     | 806531908  | 888933800,1 | 48068049,51 |

| Huh 7 S-HDAg WT<br>% g HDV RNA |           |                               |            |             |             |
|--------------------------------|-----------|-------------------------------|------------|-------------|-------------|
|                                | Dataset 1 | Technical replicate dataset 1 | Dataset 2  | Mean        | SEM         |
| Day 2                          | 2592619,2 | 1868824,97                    | 1157170,31 | 1872871,507 | 414383,3525 |
| Day 4                          | 2273770,7 | 2843927,37                    | 3418777,43 | 2845491,826 | 330535,9033 |
| Day 6                          | 39027686  | 27860633,4                    | 16696939,6 | 27861753,08 | 6446331,305 |
| Day 8                          | 32885383  | 26124969,1                    | 19393171,6 | 26134507,87 | 3894868,833 |

Multiple comparison test using Holm-Sidak correction method

|       | Significant? | P value  | Mean1      | Mean2    | Difference | SE of difference | t ratio | df | Adjusted P Value |
|-------|--------------|----------|------------|----------|------------|------------------|---------|----|------------------|
| Day 2 | Yes          | 0,000222 | 7131194    | 1872872  | 5258322    | 414417           | 12,69   | 4  | 0,000666         |
| Day 4 | Yes          | 0,003263 | 385804911  | 2845492  | 382959419  | 60880401         | 6,29    | 4  | 0,003263         |
| Day 6 | Yes          | 0,000355 | 1020274780 | 27861753 | 992413027  | 88179663         | 11,25   | 4  | 0,00071          |
| Day 8 | Yes          | 0,000057 | 888933800  | 26134508 | 862799292  | 48225589         | 17,89   | 4  | 0,000229         |

Norther blot (dataset 2)

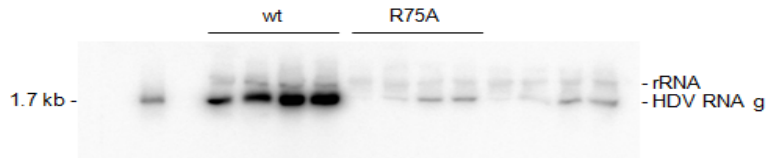

## Figure 4. Loss of HDAg Binding to BAZ2B Impairs HDV Replication

Fig. 4c HDV RIP in wt HDV or R75A HDV infected PHHs

|        | wt HDV (% Input) |           |
|--------|------------------|-----------|
|        | Dataset 1        | Dataset 2 |
| HDAg   | 80,14851         | 64,54987  |
| Pol II | 28,19531         | 22,97153  |
| BAZ2B  | 5,273036         | 3,360893  |
| SNF2L  | 8,824644         | 8,458326  |
| H3     | 0,2              | 0,2       |

|        | R75A HDV (% Input) |           |
|--------|--------------------|-----------|
|        | Dataset 1          | Dataset 2 |
| HDAg   | 24,04677           | 14,56504  |
| Pol II | 2,822522           | 1,497588  |
| BAZ2B  | 0                  | 0         |
| SNF2L  | 1,016885           | 1,00023   |
| H3     | 0,2                | 0,2       |

**Supplementary Figure 1. Characterization of the HepaRG cell line expressing StrepTag (ST) S-HDAg protein under the control of a tetracycline inducible promoter**

Fig S1a. Dose-dependent induction of the ST\_S-HDAg protein

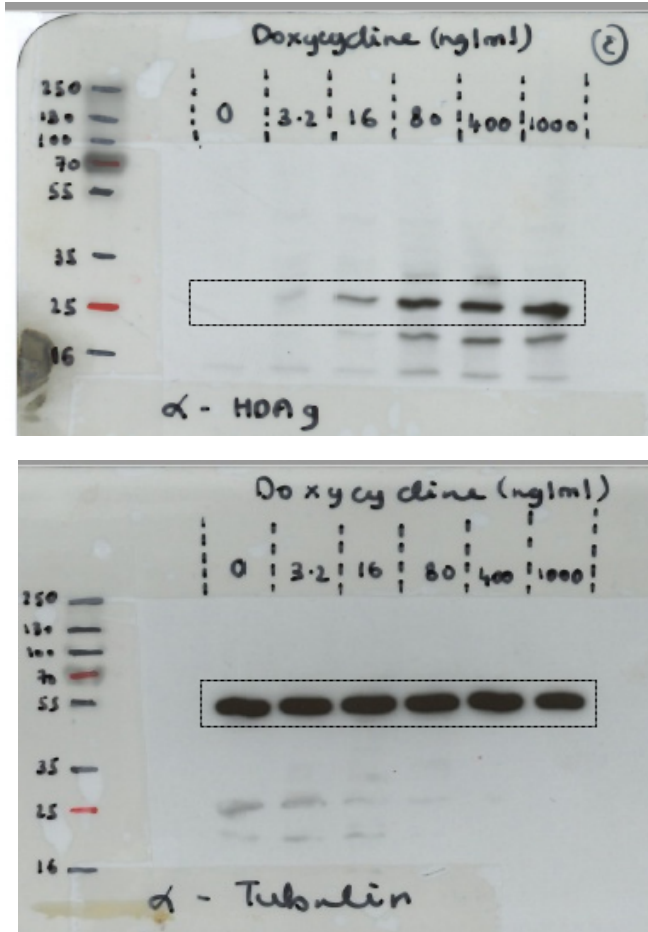

**Supplementary Figure 1. Characterization of the HepaRG cell line expressing StrepTag (ST) S-HDAg protein under the control of a tetracycline inducible promoter**

Fig S1b. Time-dependent induction of ST\_S-HDAg protein expression

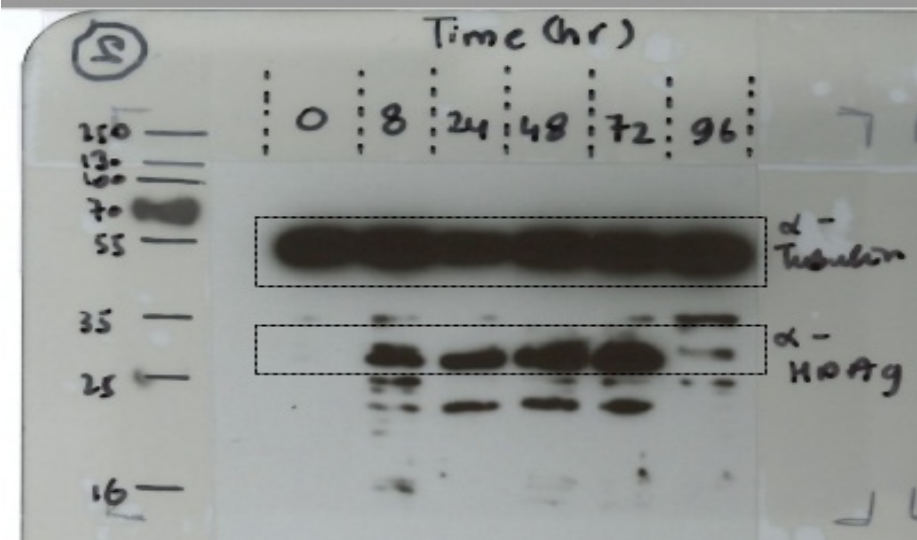

**Supplementary Figure 1. Characterization of the HepaRG cell line expressing StrepTag (ST) S-HDAg protein under the control of a tetracycline inducible promoter**

Fig. S1c The ST\_S-HDAg protein is predominantly localized in the chromatin bound fraction

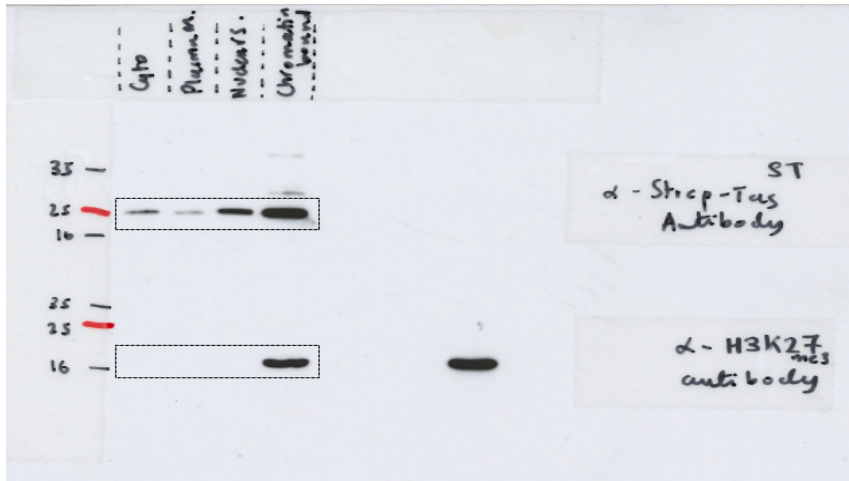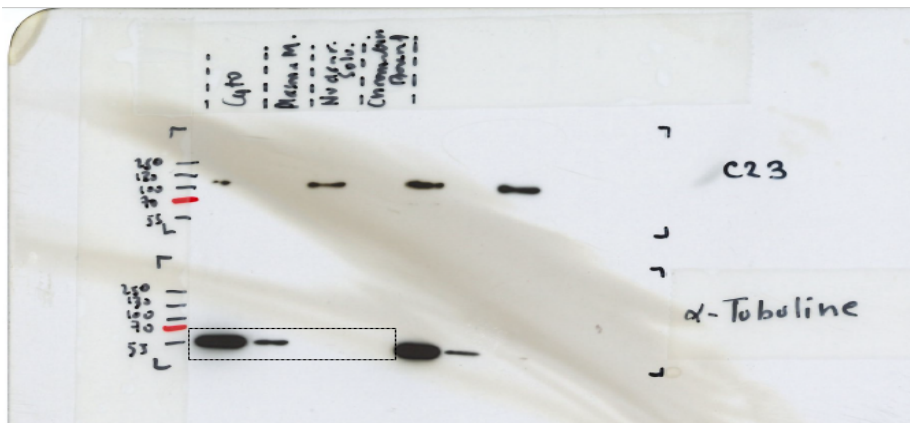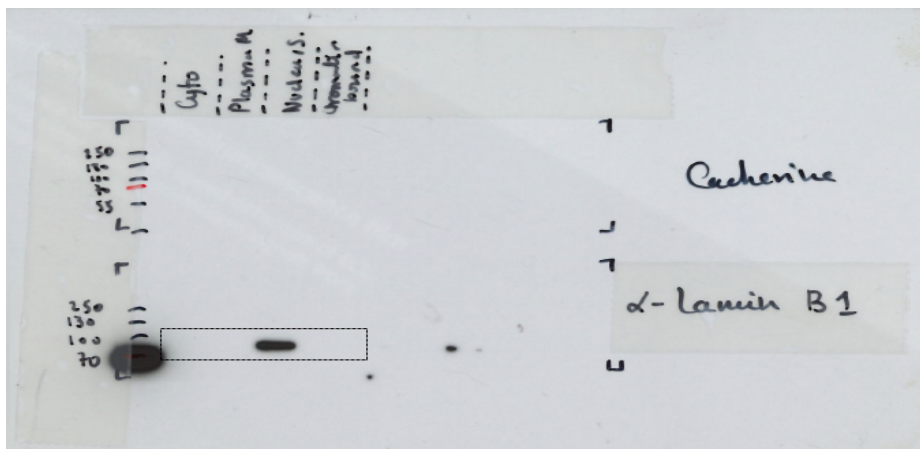



**Supplementary Figure 1. Characterization of the HepaRG cell line expressing StrepTag (ST) S-HDAg protein under the control of a tetracycline inducible promoter**

Fig. S1d The ST\_S-HDAg protein accumulates in the nucleus

Provided upon request

(The files could not be enclosed since they were too heavy to be uploaded)

# Supplementary Figure 1. Characterization of the HepaRG cell line

Fig. S1e The ST-S-HDAg protein is functional in HDV replication

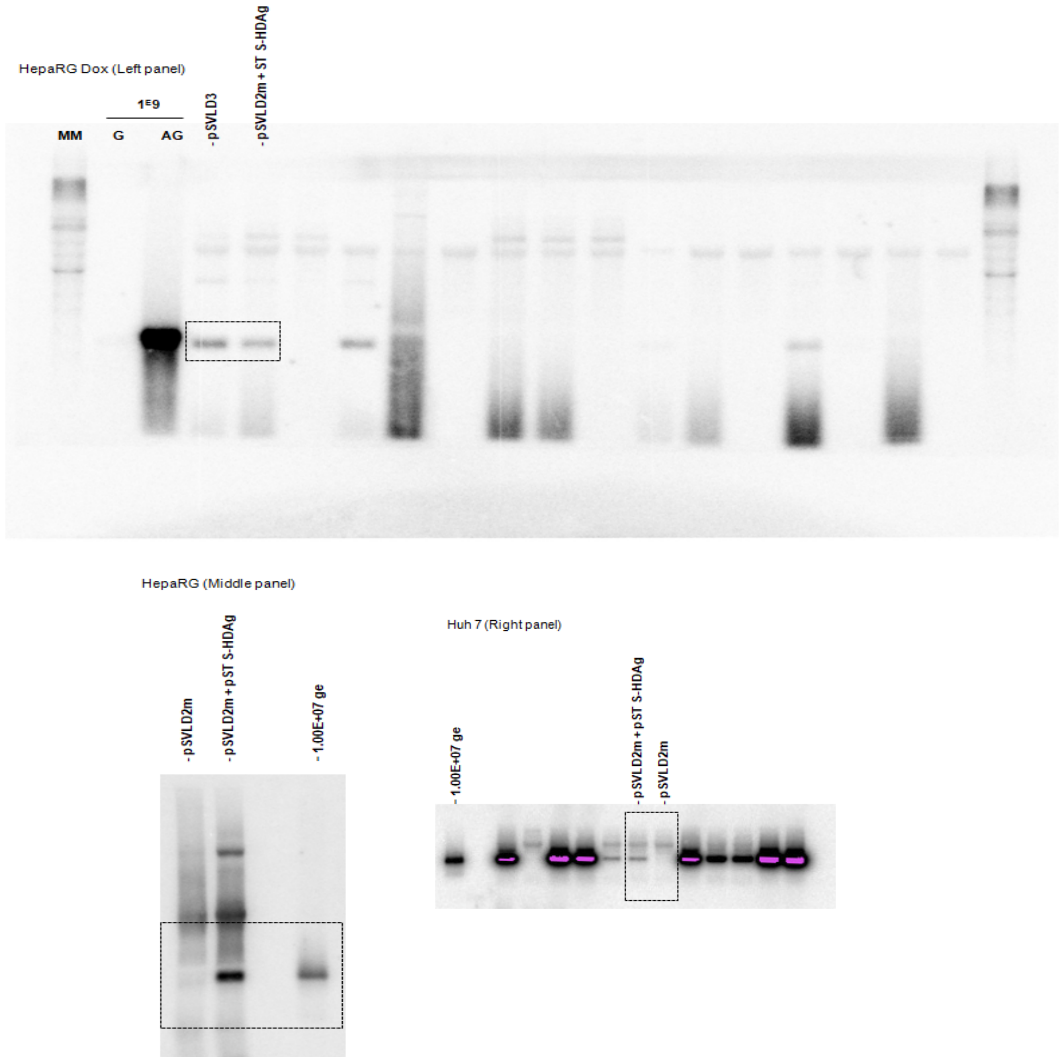

**Supplementary Figure 4. ST-S-HDAg affinity purification on Strep-Tactin® coated beads**

Fig S4a. The ST-S-HDAg was subjected to affinity chromatography on a Strep-Tactin®-XT resin

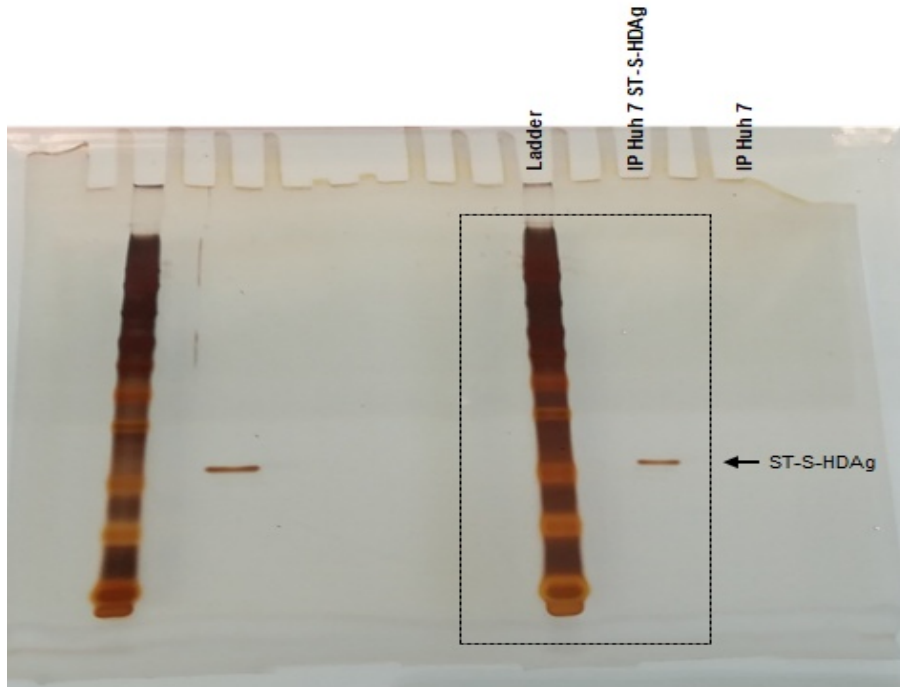

# Supplementary Figure 4. ST-S-HDAg affinity purification on Strep-Tactin® coated beads

Fig S4b. ST-S-HDAg binds specifically to the StrepTactin®-XT beads

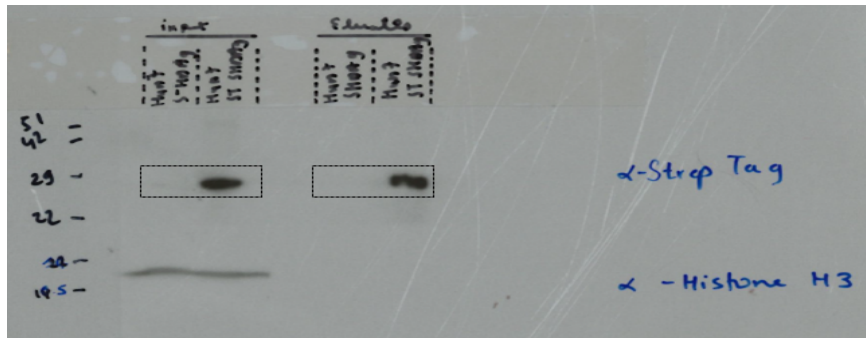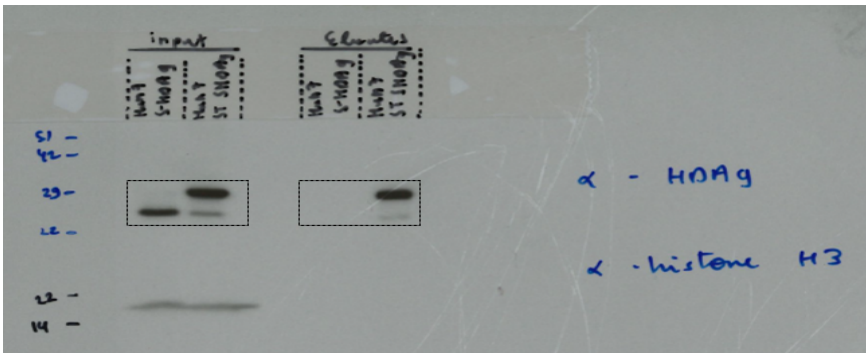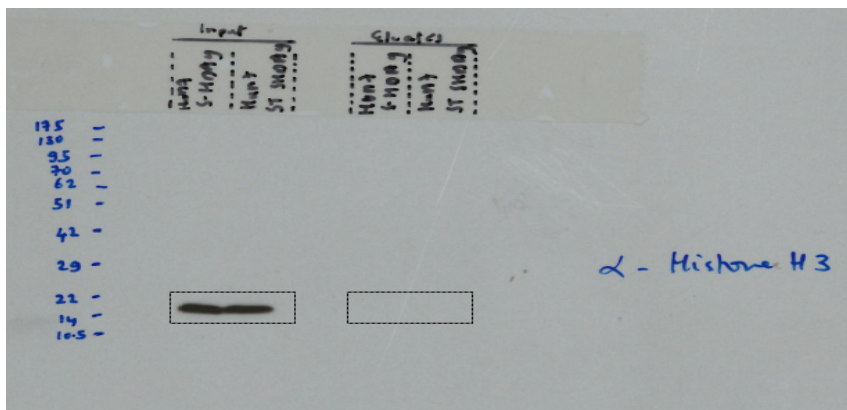

# Supplementary Figure 4. ST-S-HDAg affinity purification on Strep-Tactin® coated beads

Fig S4c. Pull-down assay of His-Tag BAZ2B BRD and ST-S-HDAg

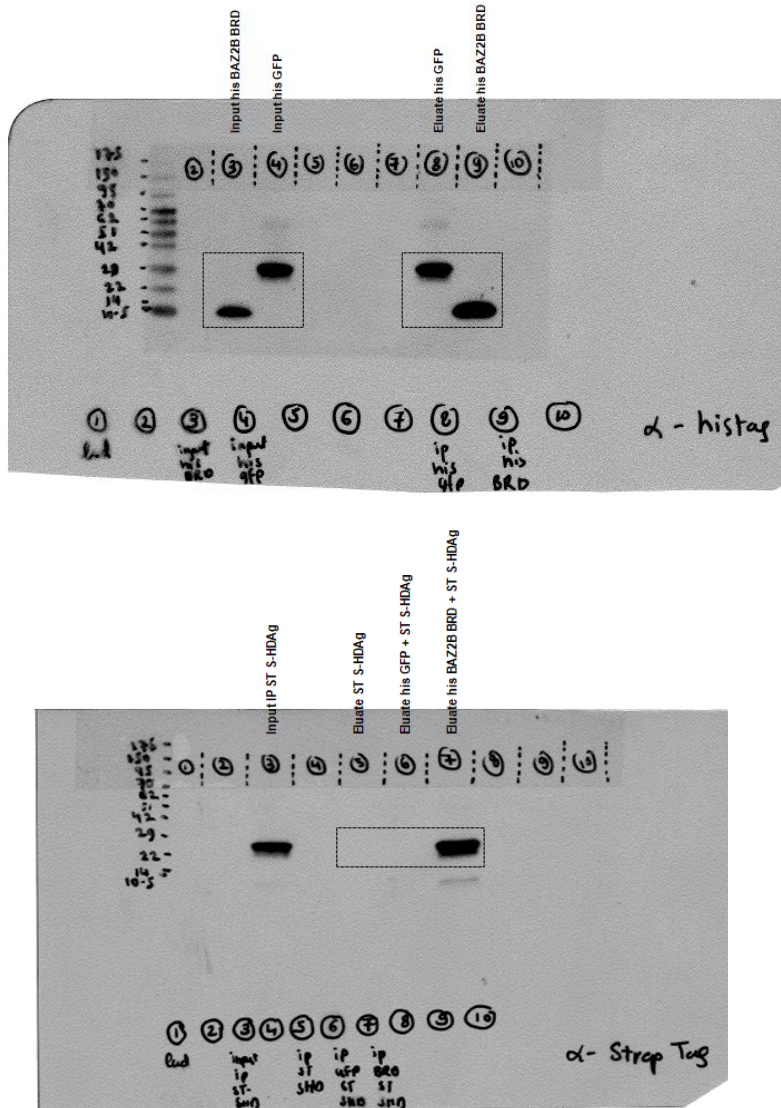

**Supplementary Figure 5. Recombinant virus production, calibration and infection of the Huh7-106 cell line.**

Fig S5a. Viral production

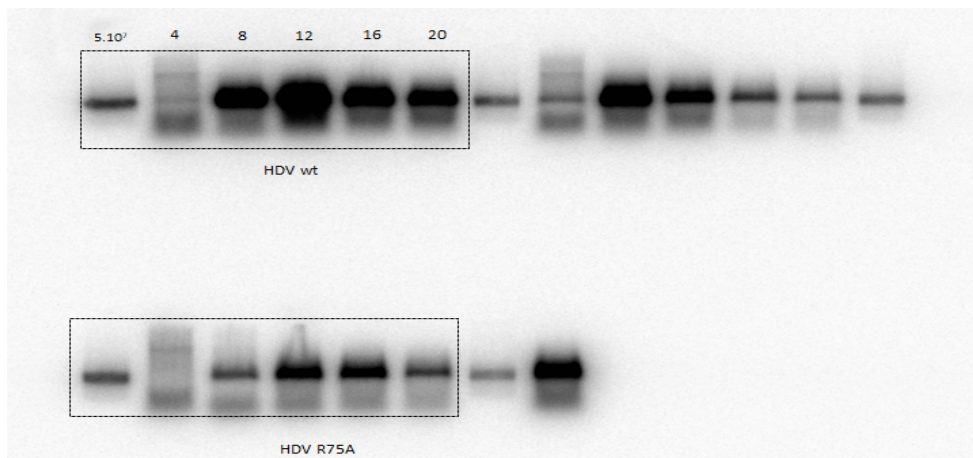

**Supplementary Figure 5. Recombinant virus production, calibration and infection of the Huh7-106 cell line.**

Fig S5b. Northern blot and immunoblot were performed on viral preparations to standardize the inoculum for both viruses

**HDV RNA**

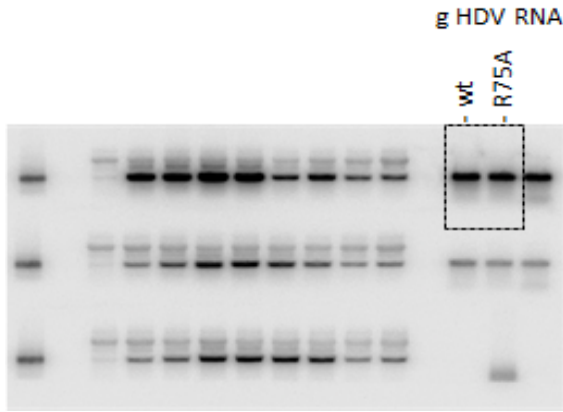

**HDAg proteins**

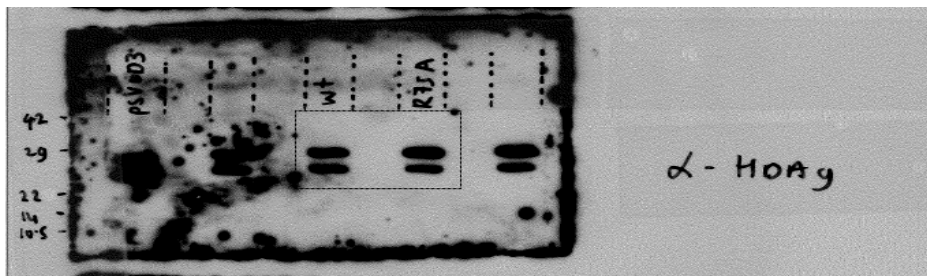

**Supplementary Figure 5. Recombinant virus production, calibration and infection of the Huh7-106 cell line.**

Fig S5c. Viral infection of Huh7-106 cell line

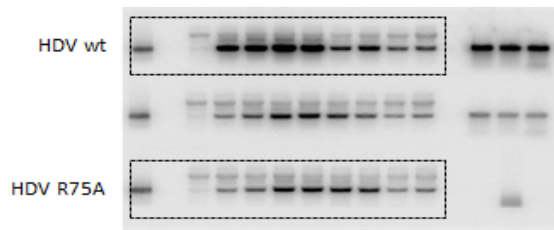



**Supplementary Figure 5. Recombinant virus production, calibration and infection of the Huh7-106 cell line.**

Fig S5d. Antigenomic (ag) HDV RNA was detected using a genomic riboprobe in total cell RNA prepared

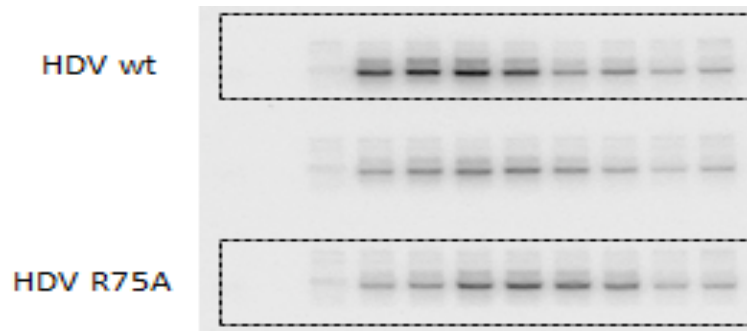

Supplement: MOESM3 [file 41467_2020_14299_MOESM3_ESM.pdf]
